# Supplementary material
Source: PubMed Central journal article supplement (PMC8728598)

### Source Data for Figure 3

Fig.3B

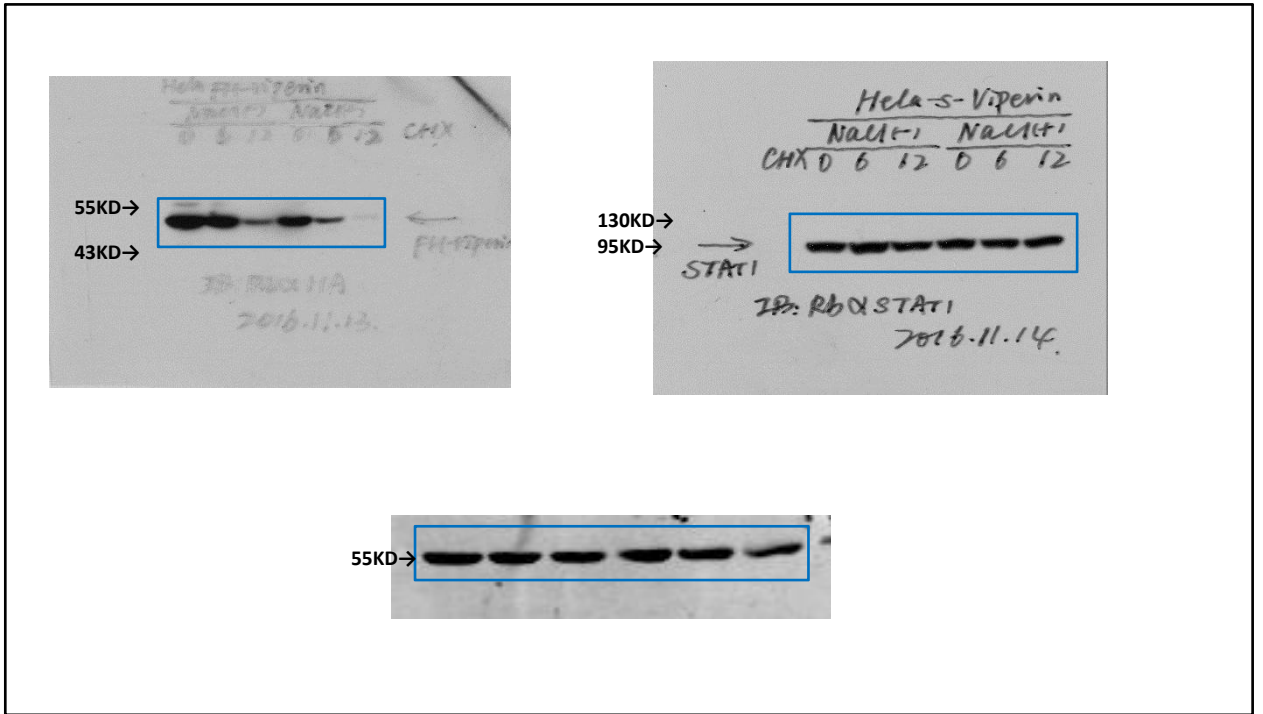

Fig.3C

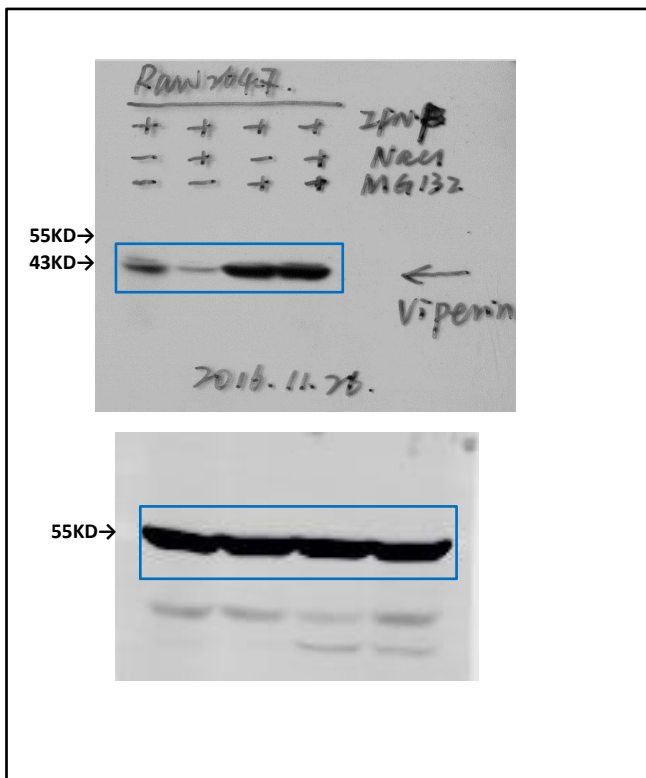

Fig.3D

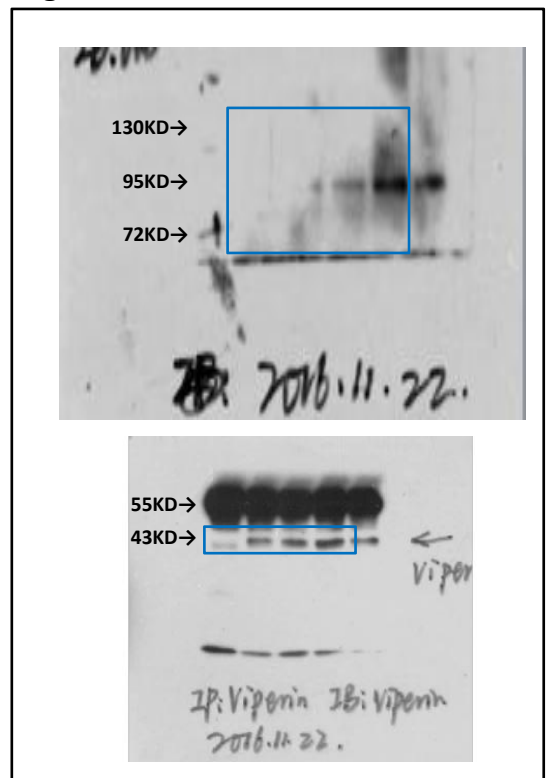

Fig.3E

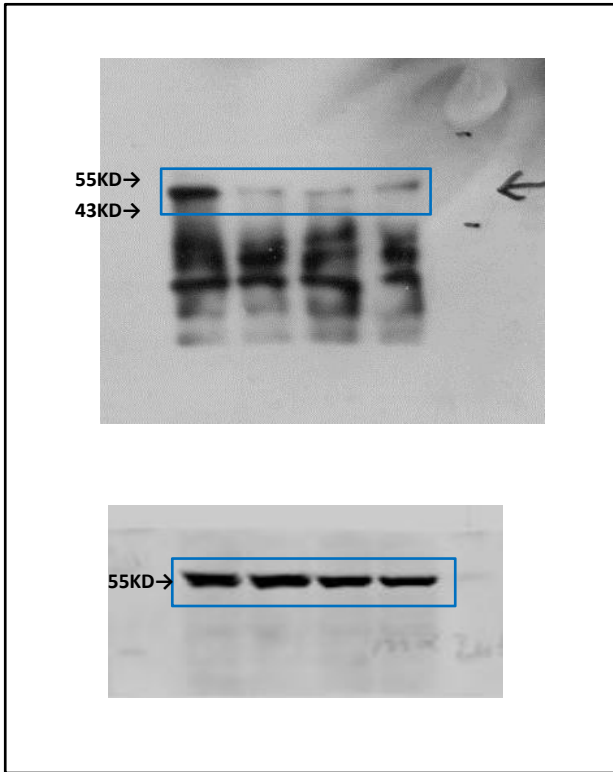

Fig.3G

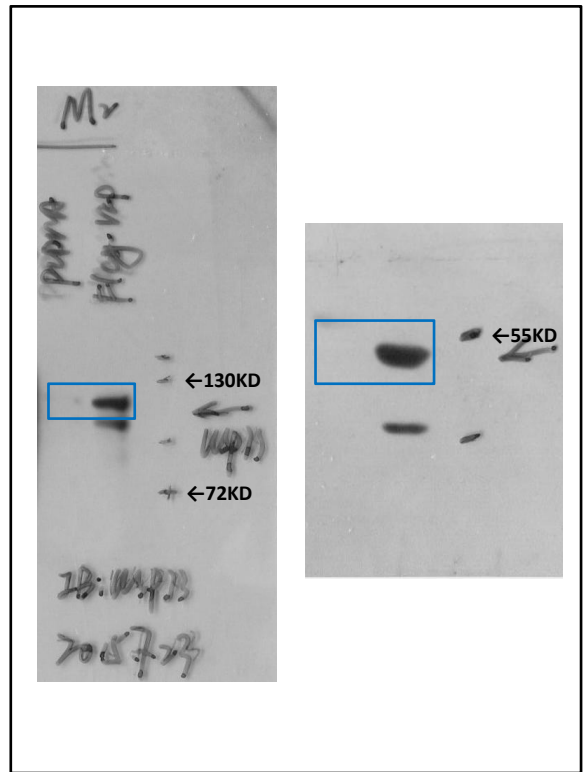

Fig.3H

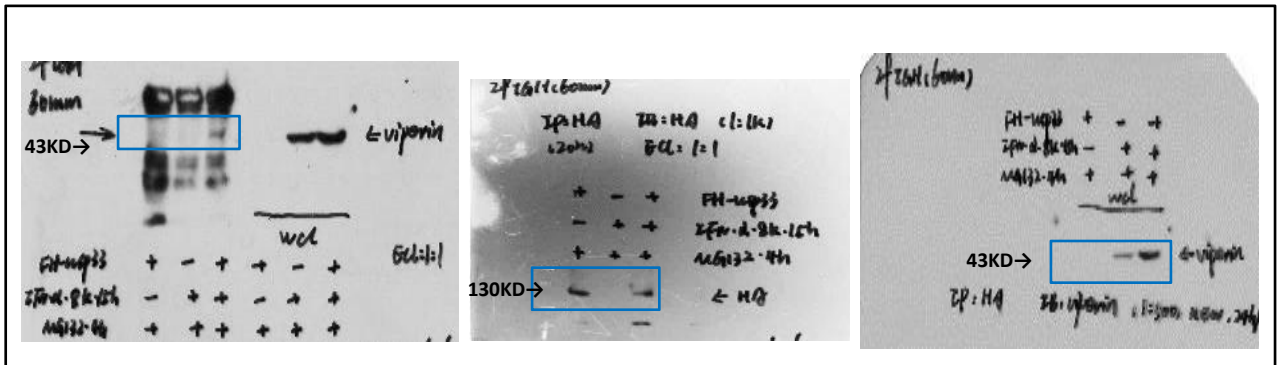

Fig.3I

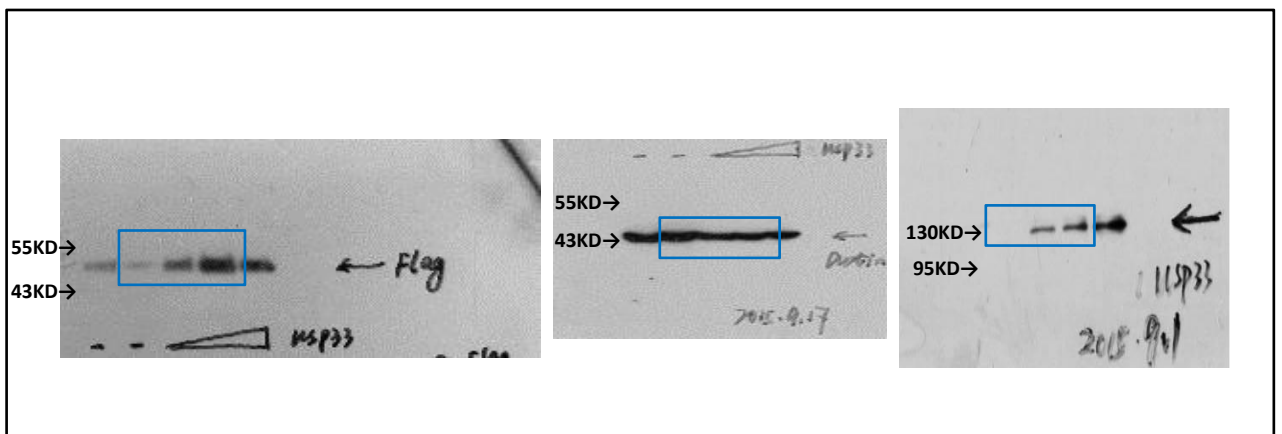

Fig. 3J

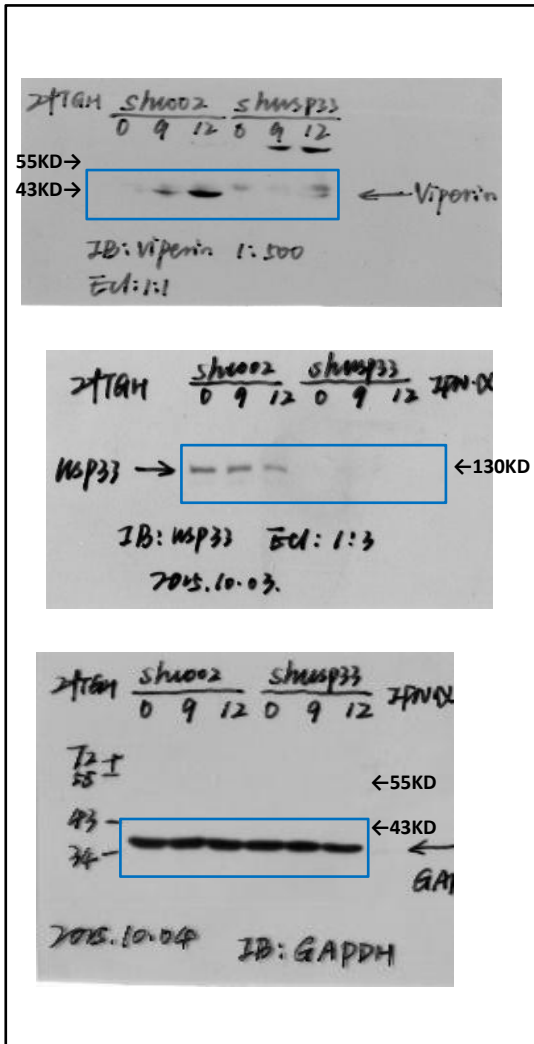

Fig. 3K

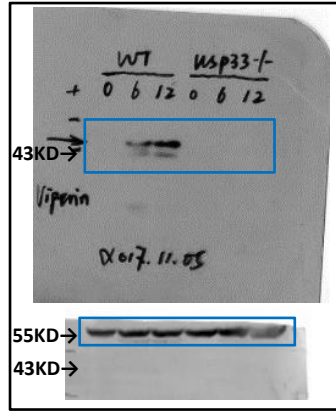

Fig. 3L

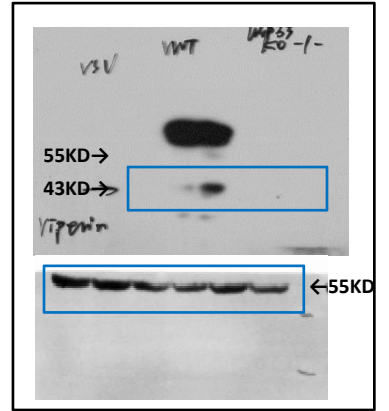

Fig. 3M

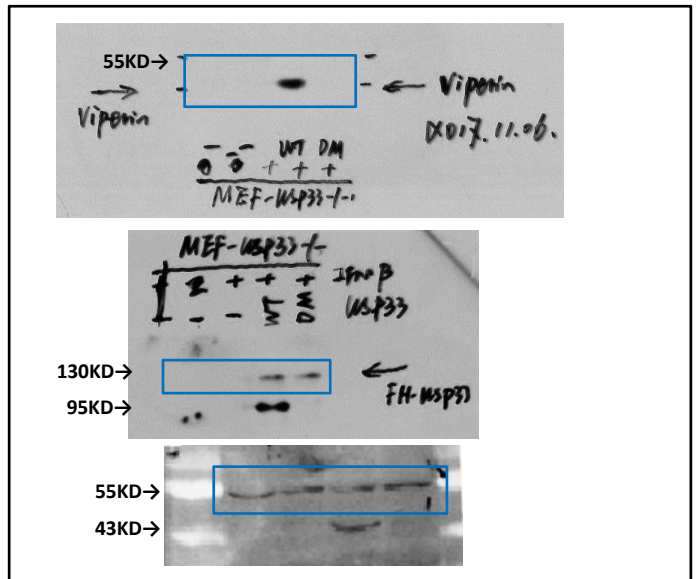

Fig. 3N

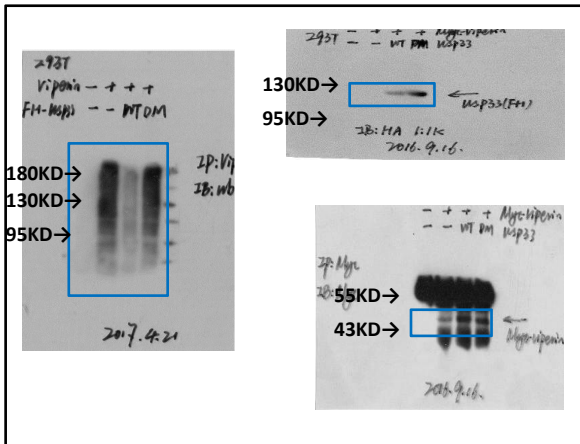

Fig. 3O

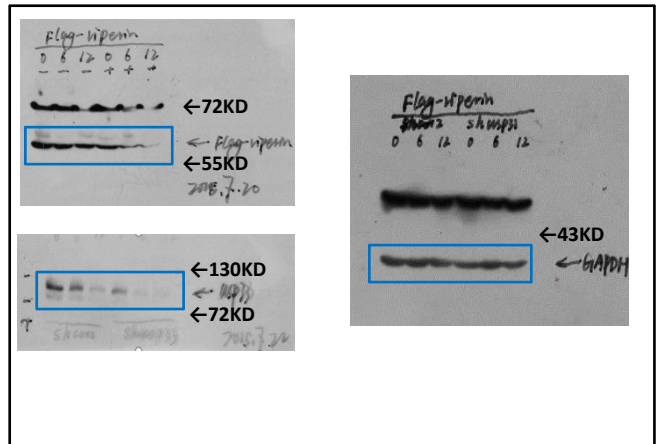

Supplement: EMBR-23-e53466-s001.pdf [file EMBR-23-e53466-s001.pdf]

# Source Data for Figure 5

**Fig.5B**

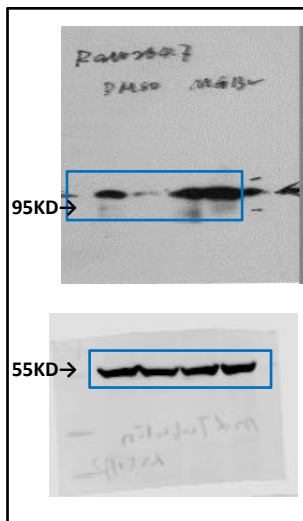

**Fig.5C**

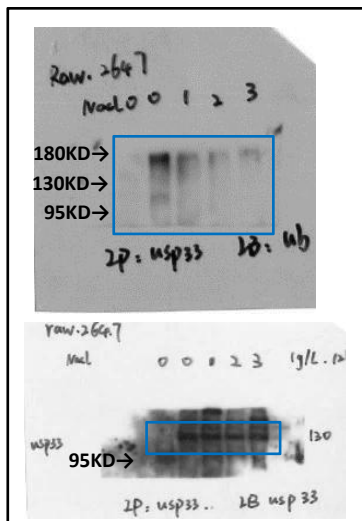

**Fig. 5D**

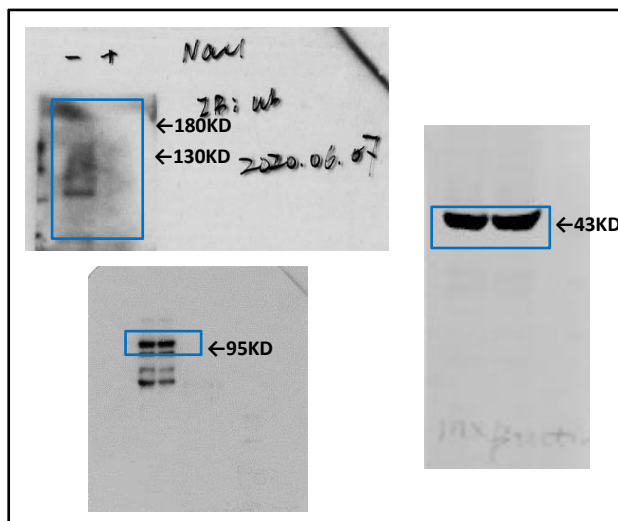

**Fig. 5E**

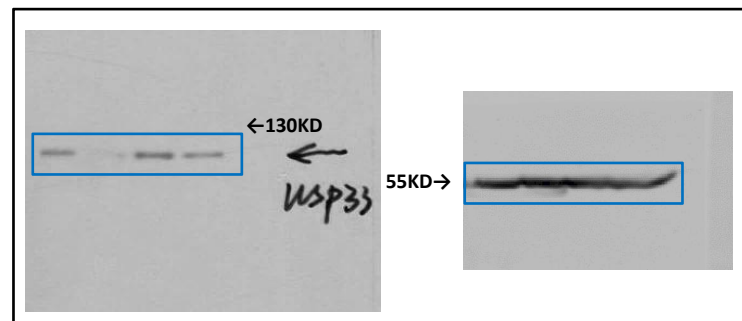

**Fig. 5F**

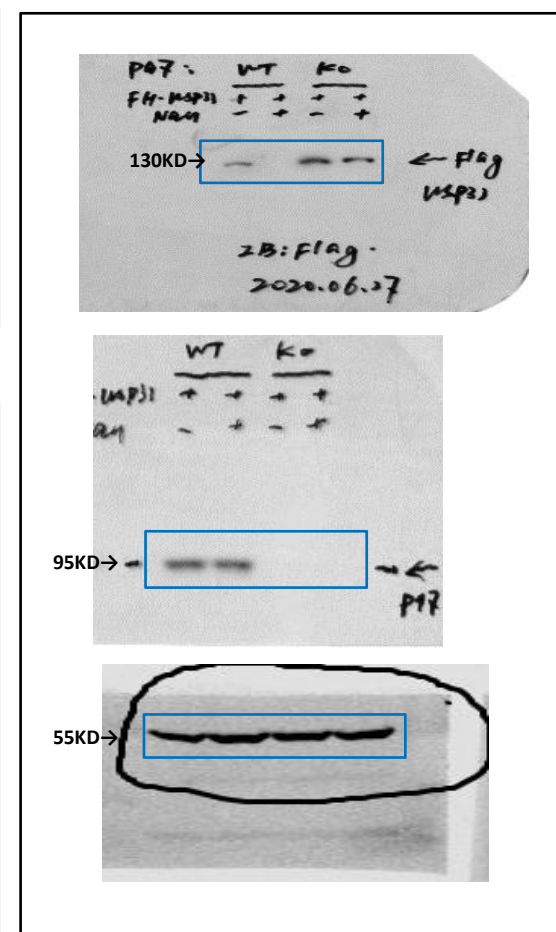

**Fig. 5G**

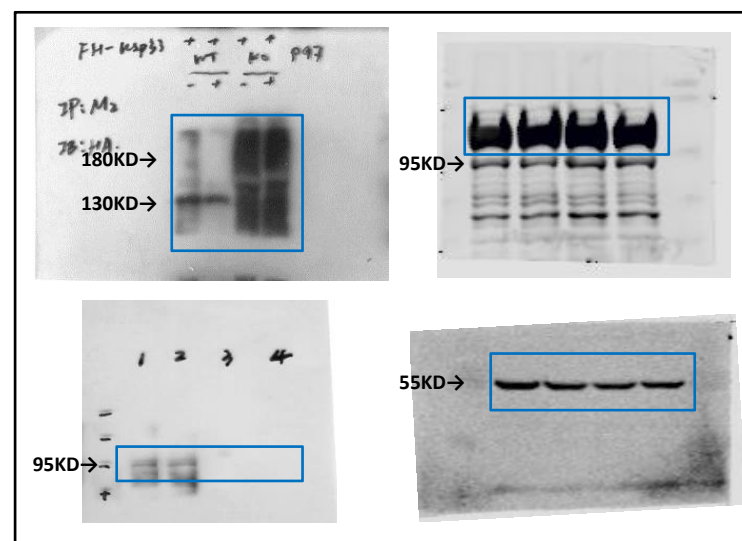

Fig. 5H

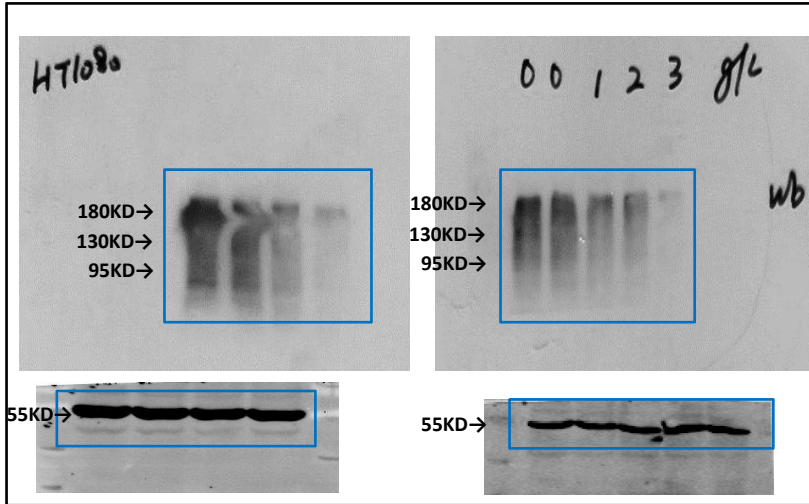

Fig. 5I

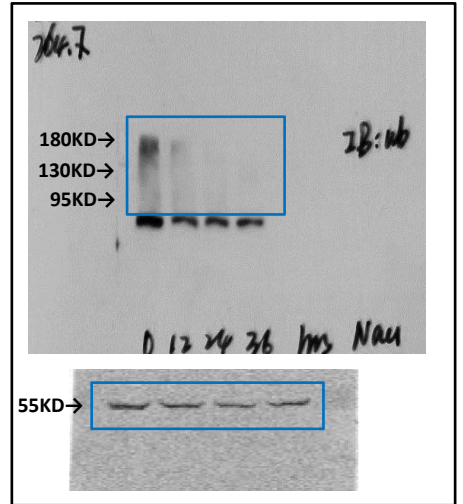

Fig. 5J

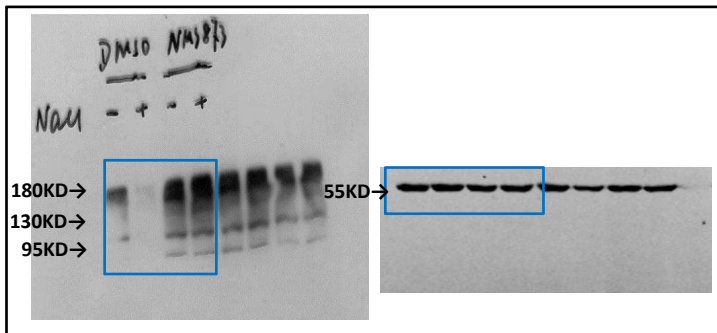

Fig. 5K

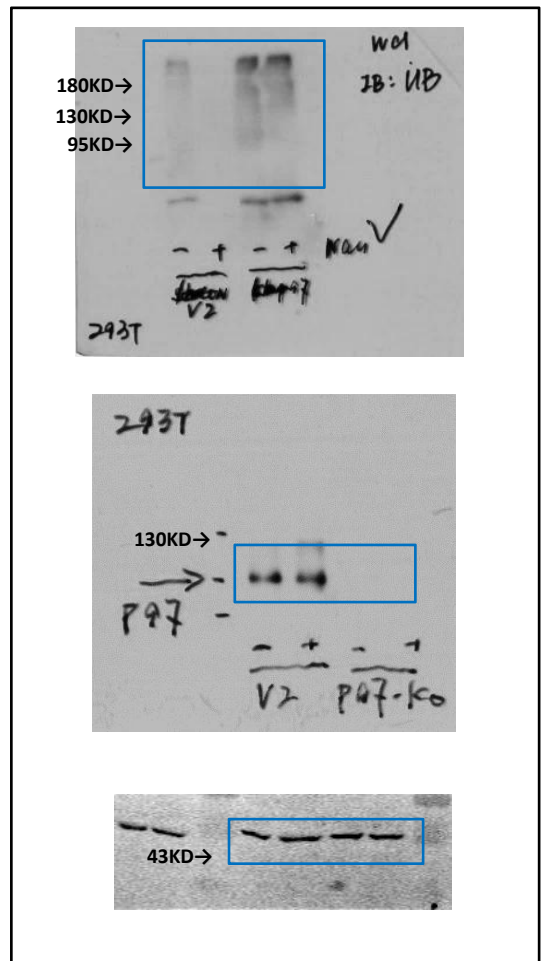

Fig. 5L

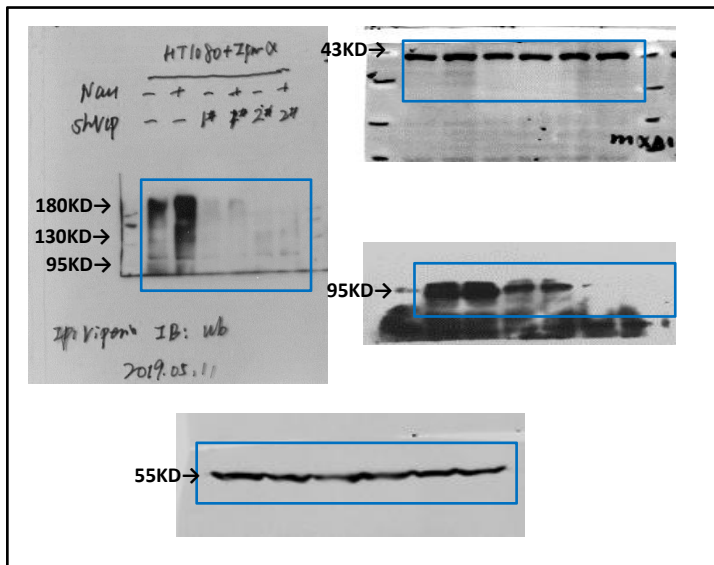

Fig. 5M

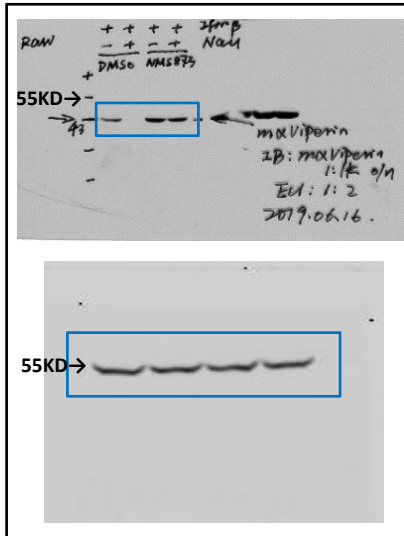

Fig. 5N

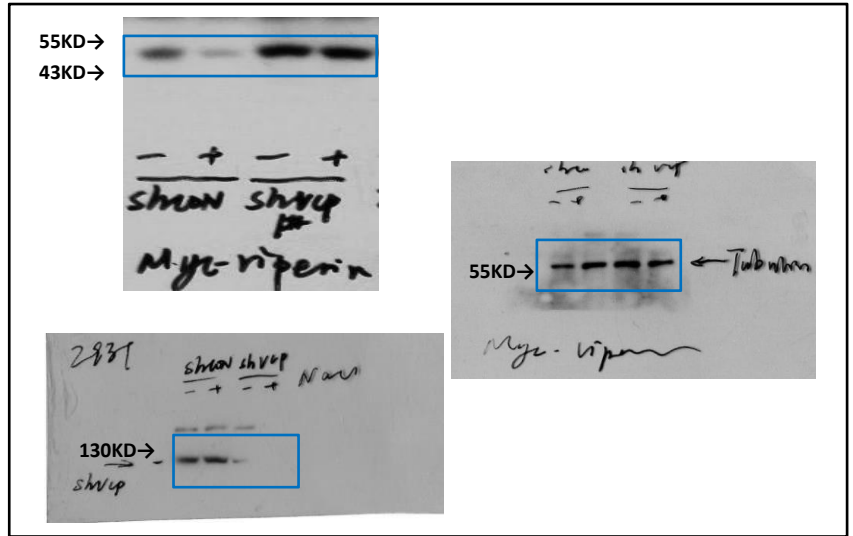

Supplement: EMBR-23-e53466-s003.pdf [file EMBR-23-e53466-s003.pdf]

# Source Data for Figure 6

Fig. 6A

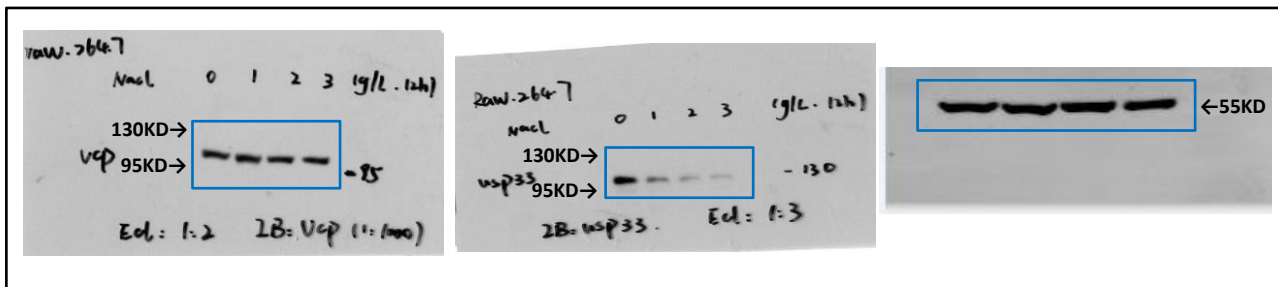

Fig. 6B

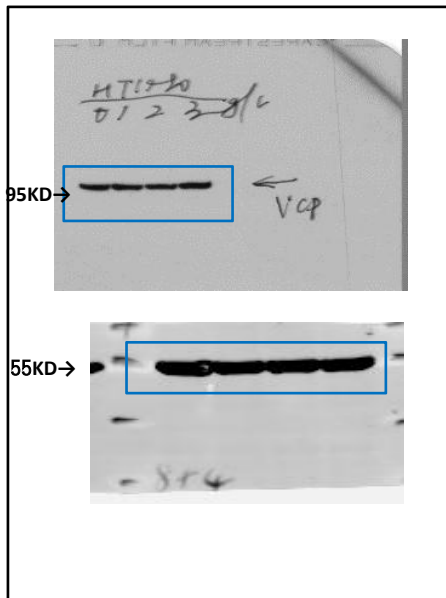

Fig. 6C

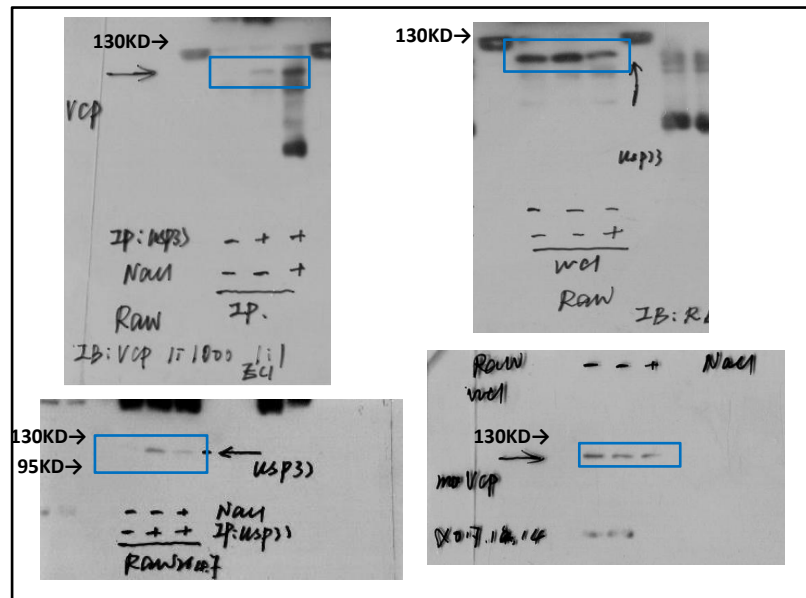

Fig. 6D

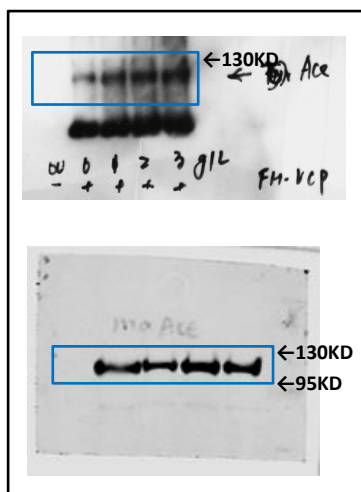

Fig. 6H

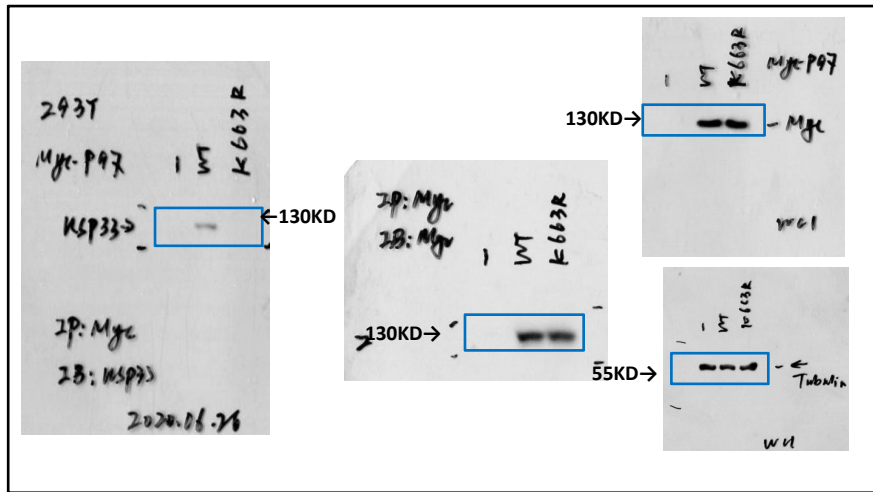

Fig. 6G

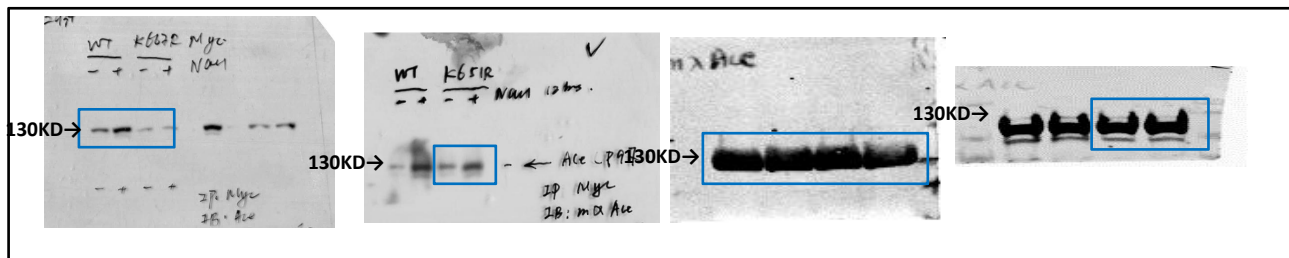

Fig. 6I

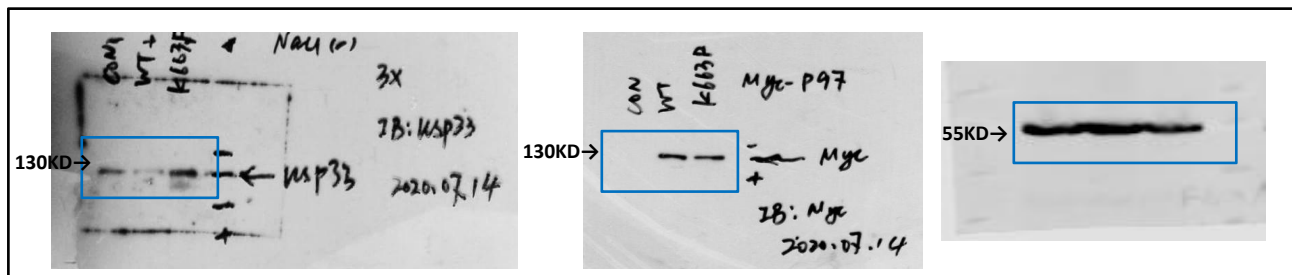

Fig. 6J

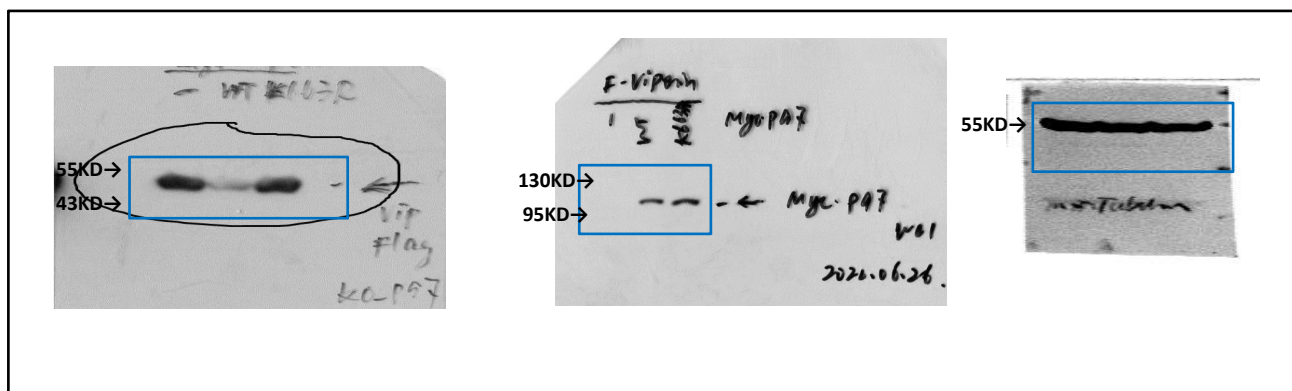

Fig. 6K

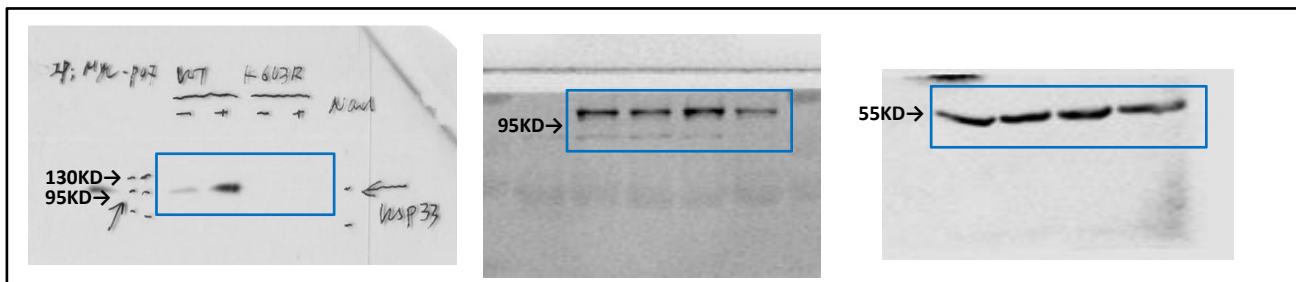

Fig. 6L

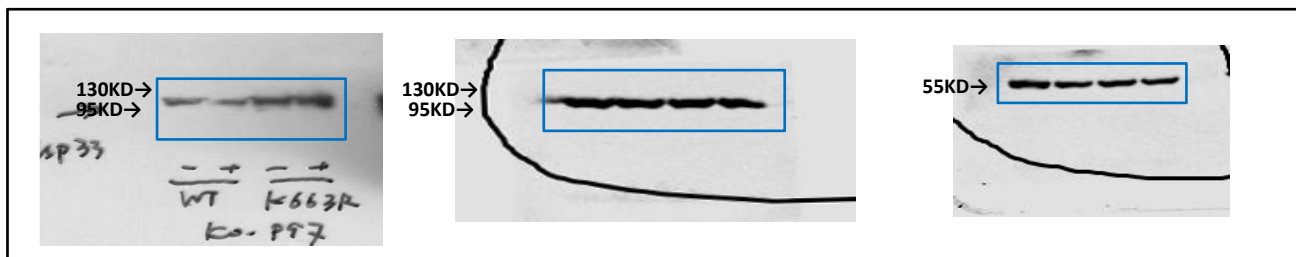

**Fig. 6M**

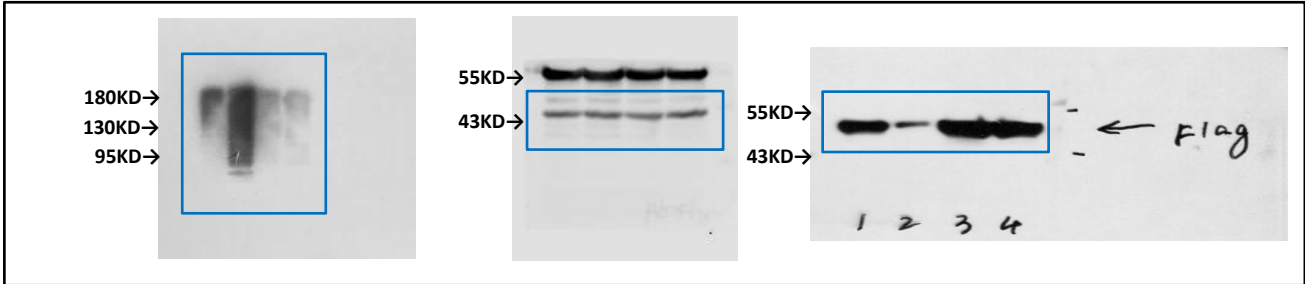

Supplement: EMBR-23-e53466-s006.pdf [file EMBR-23-e53466-s006.pdf]

## Source Data for Figure 2

### Fig.2A

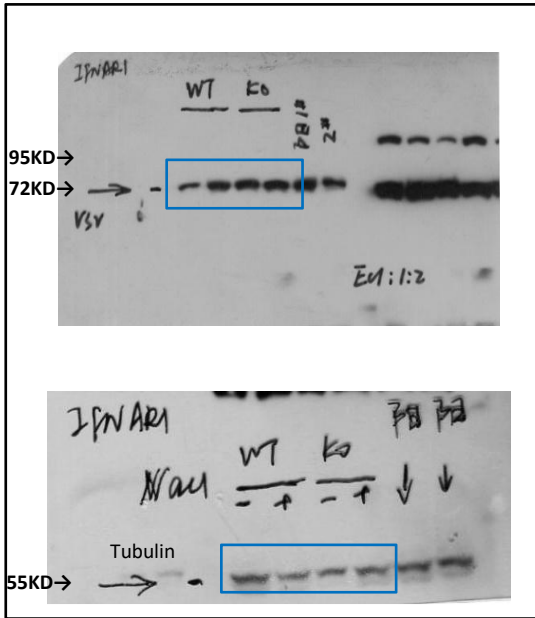

### Fig.2D

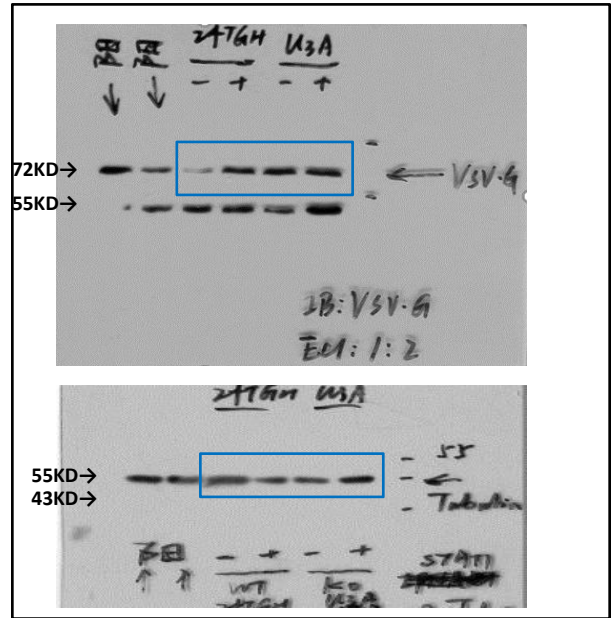

### Fig.2E

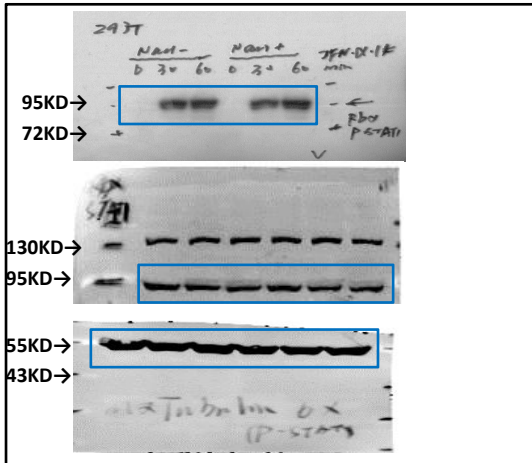

### Fig.2H

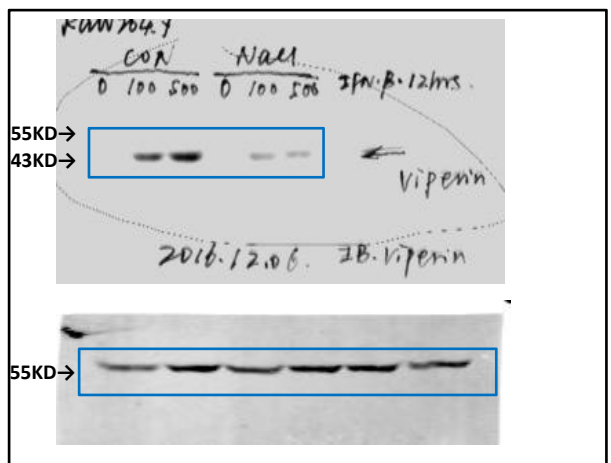

### Fig.2I

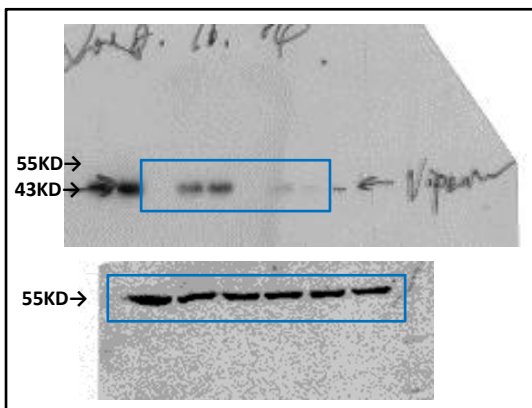

### Fig.2J

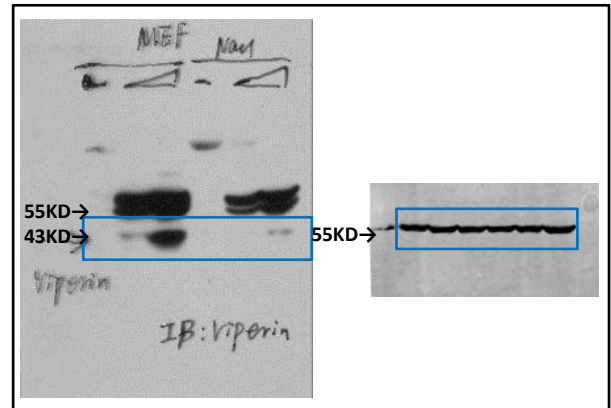

Fig.2K

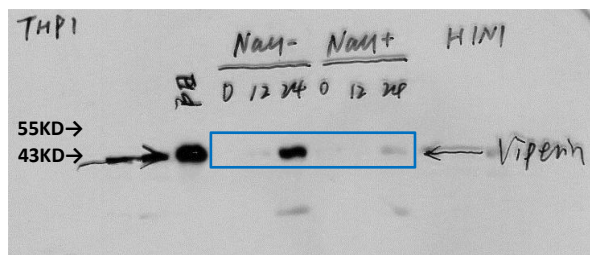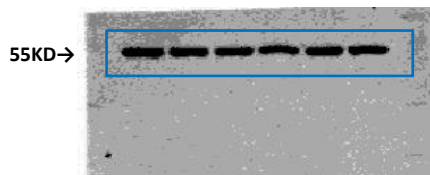

Supplement: EMBR-23-e53466-s007.pdf [file EMBR-23-e53466-s007.pdf]

# Source Data for Figure 7

**Fig. 7A**

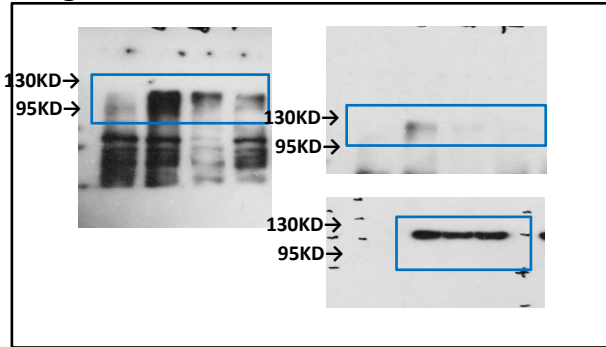

**Fig. 7B**

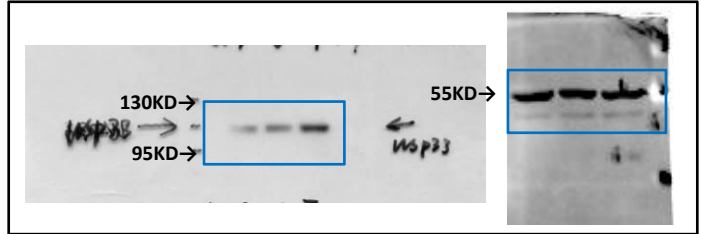

**Fig. 7C**

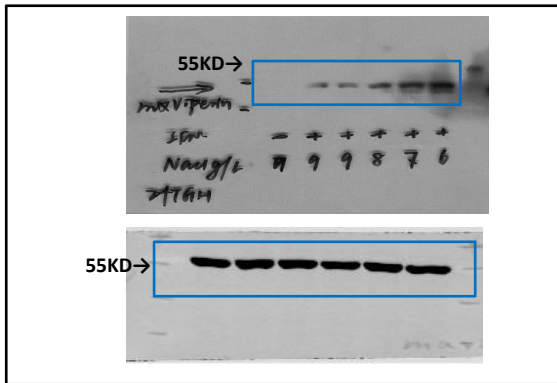

**Fig. 7G**

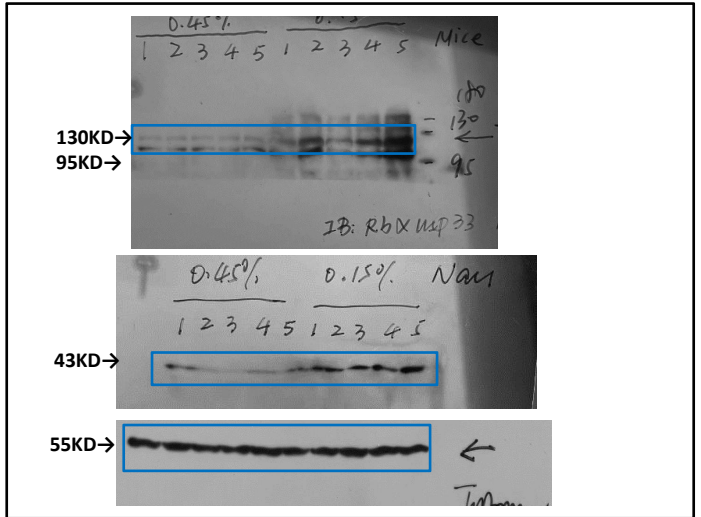

Supplement: EMBR-23-e53466-s008.pdf [file EMBR-23-e53466-s008.pdf]

# Source Data for Figure 4

**Fig. 4A**

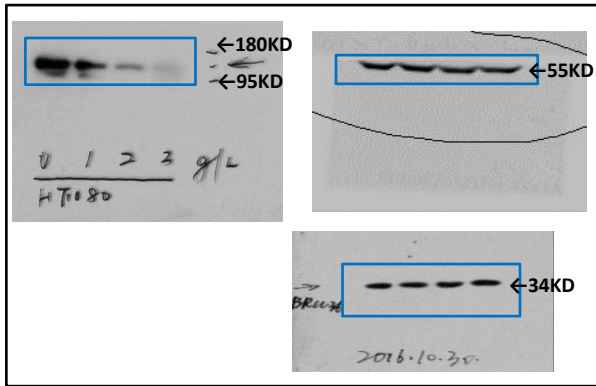

**Fig. 4B**

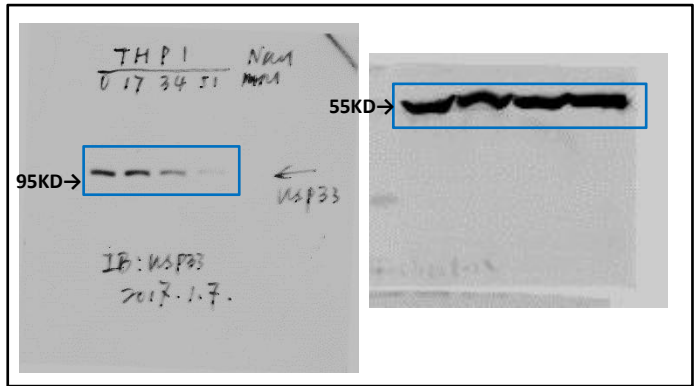

**Fig. 4C**

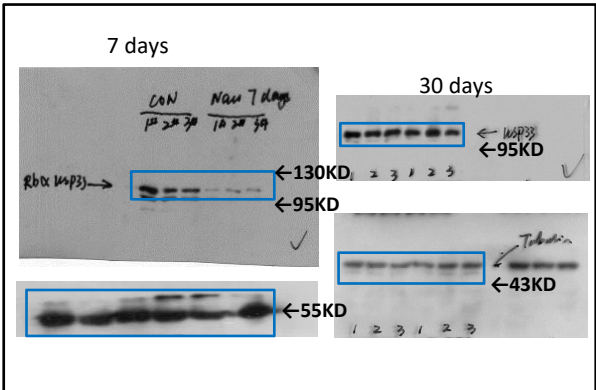

**Fig. 4D**

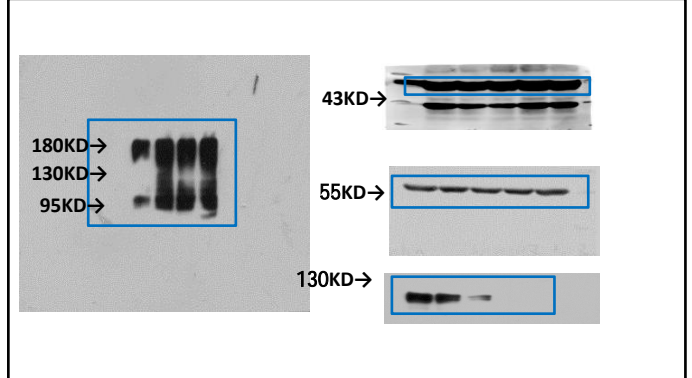

**Fig. 4E**

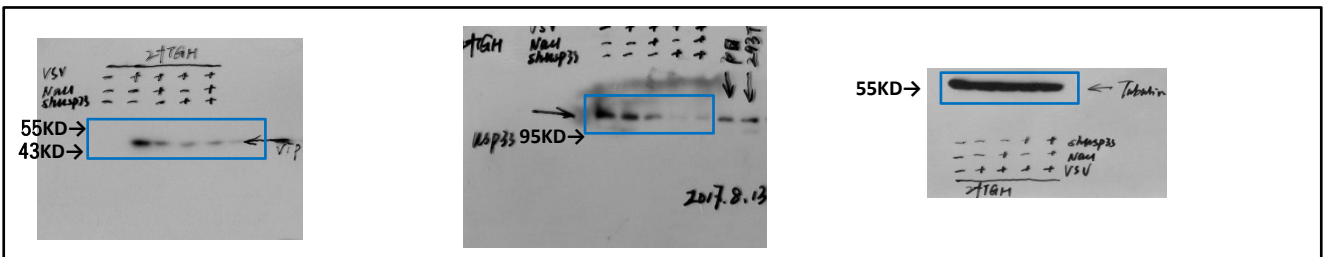

**Fig. 4F**

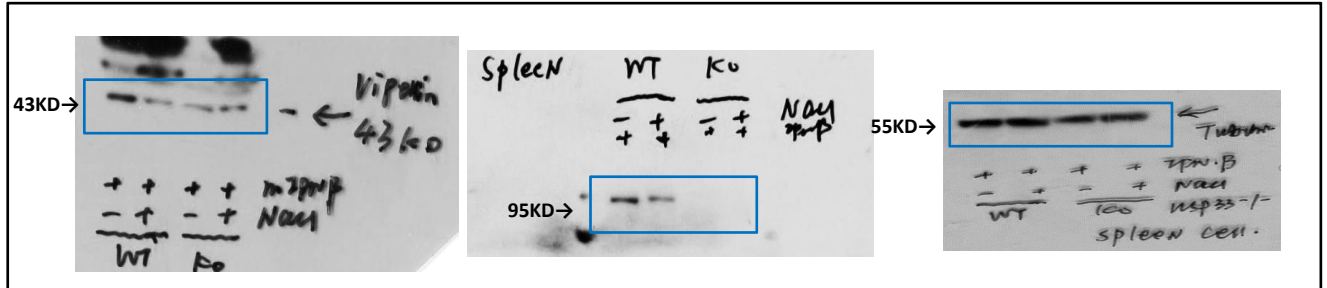

**Fig. 4H**

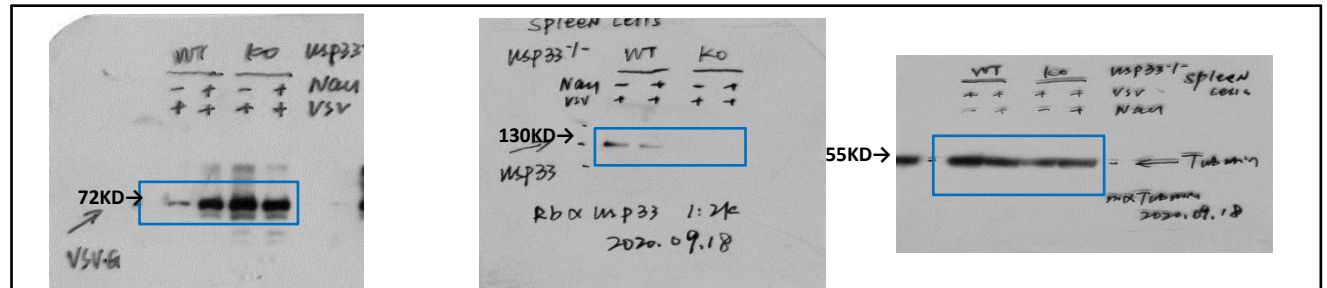

Supplement: EMBR-23-e53466-s009.pdf [file EMBR-23-e53466-s009.pdf]
